# Supplementary material
Source: PubMed Central journal article supplement (PMC7312786)
Supplement: NIHMS1601346-supplement-bi7b01176_si_001.pdf [file NIHMS1601346-supplement-bi7b01176_si_001.pdf]

Supplementary Materials for

**A small-molecule inhibitor of human DNA polymerase  $\eta$  potentiates the effects  
of cisplatin in tumor cells**

Maroof K. Zafar<sup>†</sup>, Leena Maddukuri<sup>†</sup>, Amit Ketkar<sup>†</sup>, Narsimha R. Penthalala<sup>‡</sup>, Megan R. Reed<sup>†</sup>, Sarah Eddy<sup>†</sup>, Peter A. Crooks<sup>‡</sup>, and Robert L. Eoff<sup>†,\*</sup>

*<sup>†</sup>Department of Biochemistry and Molecular Biology, University of Arkansas for Medical Sciences, Little Rock, AR 72205-7199, U.S.A.*

*<sup>‡</sup>Department of Pharmaceutical Sciences, University of Arkansas for Medical Sciences, Little Rock, AR 72205-7199, U.S.A.*

Address correspondence to:

Robert L. Eoff

Department of Biochemistry & Molecular Biology

University of Arkansas for Medical Sciences

325 Jack Stephens Drive

Little Rock, Arkansas 72205-7199

Telephone: (501) 686-8343

Fax: (501) 686-8169

E-mail: [RLEOFF@UAMS.EDU](mailto:RLEOFF@UAMS.EDU)

*Running Title: Inhibitors of hpol  $\eta$  to improve genotoxic drugs*

## TABLES

**Table S1.** Summary of IBA/ITBA chemical structures and the inhibition of DNA polymerase eta

| Number | Compound I.D. | Structure                                                                           | Mean % activity of hpol η | S.D. in mean % activity  |
|--------|---------------|-------------------------------------------------------------------------------------|---------------------------|--------------------------|
| 1.     | PNR-7-02      | 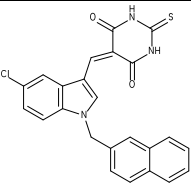   | No pol activity detected  | No pol activity detected |
| 2.     | PNR-7-01      |    | No pol activity detected  | No pol activity detected |
| 3.     | PNR-9-66B     |   | No pol activity detected  | No pol activity detected |
| 4.     | PNR-6-92      |  | No pol activity detected  | No pol activity detected |
| 5.     | PNR-6-89      |  | No pol activity detected  | No pol activity detected |
| 6.     | PNR-6-97      |  | No pol activity detected  | No pol activity detected |

|     |                  |                                                                                     |             |             |
|-----|------------------|-------------------------------------------------------------------------------------|-------------|-------------|
| 7.  | <u>PNR-7-39</u>  | 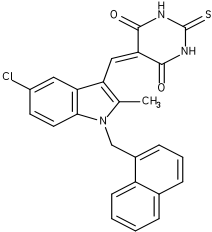   | <u>16.2</u> | <u>12.8</u> |
| 8.  | <u>PNR-3-80</u>  |    | <u>18.4</u> | <u>1.6</u>  |
| 9.  | <u>PNR-3-84</u>  |    | <u>33.6</u> | <u>4.4</u>  |
| 10. | <u>PNR-7-40</u>  |  | <u>44.9</u> | <u>38.8</u> |
| 11. | <u>PNR-9-66A</u> |  | <u>45.1</u> | <u>16.8</u> |
| 12. | <u>PNR-3-51</u>  |  | <u>45.5</u> | <u>5.8</u>  |

|     |                  |                                                                                     |             |             |
|-----|------------------|-------------------------------------------------------------------------------------|-------------|-------------|
| 13. | <u>PNR-9-65A</u> | 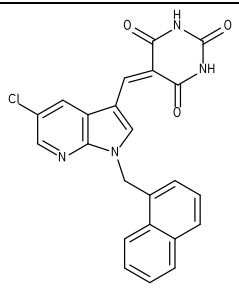   | <u>48.1</u> | <u>34.6</u> |
| 14. | <u>PNR-3-79</u>  |    | <u>56.6</u> | <u>20.0</u> |
| 15. | <u>PNR-3-85</u>  |   | <u>57.8</u> | <u>27.2</u> |
| 16. | <u>PNR-6-98</u>  |  | <u>58.7</u> | <u>33.4</u> |
| 17. | <u>PNR-6-83</u>  |  | <u>62.3</u> | <u>22.8</u> |
| 18. | <u>PNR-9-65B</u> |  | <u>62.2</u> | <u>39.2</u> |

|     |                  |                                                                                     |             |             |
|-----|------------------|-------------------------------------------------------------------------------------|-------------|-------------|
| 19. | <u>PNR-6-82</u>  | 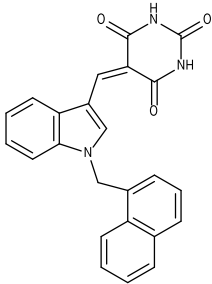   | <u>64.3</u> | <u>23.5</u> |
| 20. | <u>PNR-6-99</u>  |    | <u>71.2</u> | <u>16.6</u> |
| 21. | <u>PNR-9-14C</u> |    | <u>76.1</u> | <u>11.9</u> |
| 22. | <u>PNR-3-62</u>  |  | <u>77.1</u> | <u>15.5</u> |
| 23. | <u>PNR-6-02</u>  |  | <u>78.6</u> | <u>5.9</u>  |
| 24. | <u>PNR-9-41</u>  |  | <u>78.9</u> | <u>7.7</u>  |

|     |           |                                                                                     |      |      |
|-----|-----------|-------------------------------------------------------------------------------------|------|------|
| 25. | PNR-6-70  | 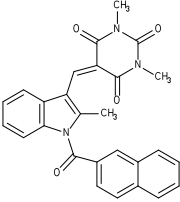   | 81.6 | 38.1 |
| 26. | PNR-6-57  |    | 82.4 | 9.2  |
| 27. | PNR-3-68  |    | 82.5 | 8.3  |
| 28. | PNR-9-63B |   | 84.1 | 16.5 |
| 29. | PNR-9-47  |  | 84.2 | 7.7  |
| 30. | PNR-9-37B |  | 87.1 | 18.6 |

|     |               |                                                                                     |      |      |
|-----|---------------|-------------------------------------------------------------------------------------|------|------|
| 31. | PNR-6-56      | 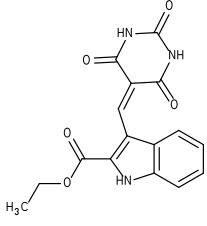   | 89.1 | 18.9 |
| 32. | PNR-9-37A     |    | 89.3 | 10.6 |
| 33. | PNR-3-60      |    | 90.9 | 15.3 |
| 34. | PNR-9-36B     |   | 91.0 | 6.5  |
| 35. | PNR-9-14B     |  | 91.3 | 9.4  |
| 36. | PNR-9-33 salt |  | 92.9 | 0.9  |
| 37. | PNR-9-63C     |  | 92.4 | 17.7 |

|     |          |                                                                                     |      |      |
|-----|----------|-------------------------------------------------------------------------------------|------|------|
| 38. | PNR-6-93 | 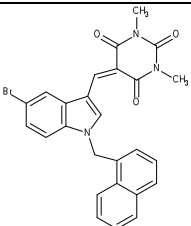   | 93.6 | 33.8 |
| 39. | PNR-5-87 |    | 93.9 | 4.7  |
| 40. | PNR-9-39 |    | 94.1 | 10.8 |
| 41. | PNR-3-55 |   | 94.6 | 8.4  |
| 42. | PNR-3-53 |  | 94.8 | 10.6 |
| 43. | PNR-5-90 |  | 94.8 | 5.8  |
| 44. | PNR-5-81 |  | 96.5 | 9.6  |



|     |                      |                                                                                     |             |             |
|-----|----------------------|-------------------------------------------------------------------------------------|-------------|-------------|
| 45. | <u>PNR-3-40</u>      | 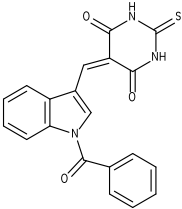   | <u>97.8</u> | <u>23.4</u> |
| 46. | <u>PNR-7-82</u>      |    | <u>97.8</u> | <u>7.3</u>  |
| 47. | <u>PNR-6-05</u>      |    | <u>98.1</u> | <u>11.0</u> |
| 48. | <u>PNR-9-33 base</u> |   | <u>98.1</u> | <u>9.1</u>  |
| 49. | <u>PNR-3-66</u>      |  | <u>98.3</u> | <u>5.9</u>  |
| 50. | <u>PNR-6-11</u>      |  | <u>99.4</u> | <u>9.5</u>  |
| 51. | <u>PNR-6-04</u>      |  | <u>98.8</u> | <u>18.7</u> |

|     |                      |                                                                                     |              |             |
|-----|----------------------|-------------------------------------------------------------------------------------|--------------|-------------|
| 52. | <u>PNR-9-32B</u>     | 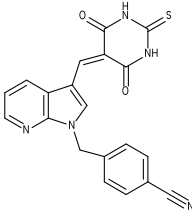   | <u>99.6</u>  | <u>11.0</u> |
| 53. | <u>PNR-9-38 salt</u> |    | <u>99.9</u>  | <u>11.5</u> |
| 54. | <u>PNR-6-01</u>      |    | <u>99.4</u>  | <u>7.8</u>  |
| 55. | <u>PNR-3-83</u>      |   | <u>100.1</u> | <u>17.7</u> |
| 56. | <u>PNR-6-10</u>      |  | <u>100.3</u> | <u>14.9</u> |
| 57. | <u>PNR-9-40</u>      |  | <u>101.3</u> | <u>13.5</u> |
| 58. | <u>PNR-3-57</u>      |  | <u>101.8</u> | <u>2.7</u>  |

|     |                      |                                                                                     |              |             |
|-----|----------------------|-------------------------------------------------------------------------------------|--------------|-------------|
| 59. | <u>PNR-9-38 base</u> | 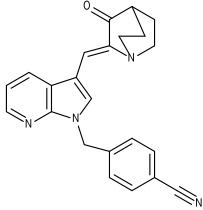   | <u>102.4</u> | <u>9.1</u>  |
| 60. | <u>PNR-9-32A</u>     |    | <u>102.6</u> | <u>11.3</u> |
| 61. | <u>PNR-9-42A</u>     |    | <u>102.7</u> | <u>14.2</u> |
| 62. | <u>PNR-5-95</u>      |   | <u>103.3</u> | <u>3.7</u>  |
| 63. | <u>PNR-6-16</u>      |  | <u>103.6</u> | <u>2.2</u>  |
| 64. | <u>PNR-3-89</u>      |  | <u>104.6</u> | <u>2.2</u>  |
| 65. | <u>PNR-6-90</u>      |  | <u>104.3</u> | <u>2.9</u>  |

|     |                  |                                                                                     |              |             |
|-----|------------------|-------------------------------------------------------------------------------------|--------------|-------------|
| 66. | <u>PNR-9-30B</u> | 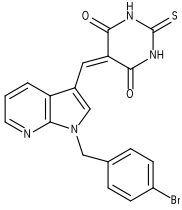   | <u>105.0</u> | <u>16.0</u> |
| 67. | <u>PNR-7-27</u>  |    | <u>105.4</u> | <u>13.3</u> |
| 68. | <u>PNR-9-36A</u> |    | <u>106.3</u> | <u>1.7</u>  |
| 69. | <u>PNR-6-91</u>  |   | <u>106.3</u> | <u>15.8</u> |
| 70. | <u>PNR-9-30A</u> |  | <u>106.9</u> | <u>7.4</u>  |
| 71. | <u>PNR-3-88</u>  |  | <u>107.2</u> | <u>1.7</u>  |
| 72. | <u>PNR-5-91</u>  |  | <u>107.9</u> | <u>17.2</u> |

|     |                  |                                                                                     |              |             |
|-----|------------------|-------------------------------------------------------------------------------------|--------------|-------------|
| 73. | <u>PNR-9-28A</u> | 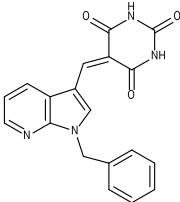   | <u>108.1</u> | <u>5.1</u>  |
| 74. | <u>PNR-5-82</u>  |    | <u>109.3</u> | <u>6.4</u>  |
| 75. | <u>PNR-9-28B</u> |    | <u>111.7</u> | <u>2.8</u>  |
| 76. | <u>PNR-9-42B</u> |   | <u>111.7</u> | <u>3.6</u>  |
| 77. | <u>PNR-7-03</u>  |  | <u>111.7</u> | <u>15.6</u> |
| 78. | <u>PNR-9-44</u>  |  | <u>113.0</u> | <u>10.5</u> |
| 79. | <u>PNR-6-08</u>  |  | <u>114.2</u> | <u>6.3</u>  |

|     |                 |                                                                                     |              |             |
|-----|-----------------|-------------------------------------------------------------------------------------|--------------|-------------|
| 80. | <u>PNR-5-85</u> | 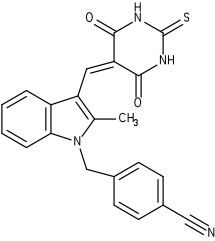   | <u>118.4</u> | <u>12.2</u> |
| 81. | <u>PNR-6-14</u> |    | <u>122.4</u> | <u>10.9</u> |
| 82. | <u>PNR-3-56</u> |    | <u>123.4</u> | <u>11.1</u> |
| 83. | <u>PNR-3-64</u> |   | <u>124.7</u> | <u>1.1</u>  |
| 84. | <u>PNR-3-50</u> |  | <u>129.6</u> | <u>7.4</u>  |
| 85. | <u>PNR-5-88</u> |  | <u>130.8</u> | <u>17.8</u> |

**Table S2.** Hpol  $\eta$ -derived peptides identified by mass spectrometry.

| Sequence (NH <sub>2</sub> -COOH)      | <i>m/z</i> | Charge state | M.W.    | Residue : Start-End |
|---------------------------------------|------------|--------------|---------|---------------------|
| (R)VVALVDmDcFFVQVEQR(Q) <sup>a</sup>  | 691.0      | +3           | 2,069.9 | 8-24                |
| (R)VVALVDMdCFFVQVEQR(Q)               | 685.6      | +3           | 2,054.0 | 8-24                |
| (R)VVALVDMdCFFVQVEQRQNPHLR(N)         | 733.8      | +4           | 2,931.4 | 8-30                |
| (R)QNPHLRNKPCAVVQYK(S)                | 521.7      | +4           | 2,083.0 | 25-40               |
| (R)QNPHLRNKPCAVVQYK(S)                | 695.3      | +3           | 2,083.0 | 25-40               |
| (R)NKPCAVVQYK(S)                      | 402.8      | +3           | 1,205.6 | 31-40               |
| (R)NKPCAVVQYKSWK(G)                   | 536.6      | +3           | 1,606.8 | 31-43               |
| (R)NKPCAVVQYKSWKGGGIIAVSYEARAFGVTR(S) | 683.3      | +5           | 3,411.7 | 31-61               |
| (K)GGGIIAVSYEAR(A)                    | 596.8      | +2           | 1,191.6 | 44-55               |
| (R)AFGVTRSmWADDAKK(L)                 | 425.4      | +4           | 1,697.8 | 56-70               |
| (R)AFGVTRSMWADDAK(K)                  | 562.9      | +3           | 1,685.7 | 56-69               |
| (R)AFGVTRSMWADDAKK(L)                 | 605.6      | +3           | 1,813.8 | 56-70               |
| (R)SmWADDAK(K)                        | 470.1      | +2           | 938.380 | 62-69               |
| (R)SMWADDAKK(L)                       | 526.2      | +2           | 1,050.4 | 62-70               |
| (K)KLcPDLLLAQVR(E)                    | 475.9      | +3           | 1,424.8 | 70-81               |
| (K)LcPDLLLAQVRESR(G)                  | 601.3      | 3            | 1,800.9 | 71-84               |
| (K)YREASVEVMEIMSR(F)                  | 567.2      | +3           | 1,698.8 | 92-105              |
| (K)YREASVEVMEImSR(F)                  | 621.9      | +3           | 1,862.8 | 92-105              |

|                                               |         |    |         |         |
|-----------------------------------------------|---------|----|---------|---------|
| (R)EASVEVMEIMSR(F)                            | 690.8   | +2 | 1,379.6 | 94-105  |
| (R)ASIDEAYVDLTSVQER(L)                        | 622.9   | +3 | 1,865.9 | 112-128 |
| (K)LQGQPISADLLPSTYIEGLPQGPTTAEETVQK(E)        | 846.1   | +4 | 3,380.7 | 132-163 |
| (R)KQGLFQWLDSLQIDNLTSPDLQLTVGAVIVEEMR(A)      | 965.0   | +4 | 3,856.0 | 168-201 |
| (R)KQGLFQWLDSLQIDNLTSPDLQLTVGAVIVEEMRAAIER(E) | 1,100.0 | +4 | 4,396.3 | 168-206 |
| (K)QGLFQWLDSLQIDNLTSPDLQLTVGAVIVEEMR(A)       | 1,243.6 | +3 | 3,727.9 | 169-201 |
| (R)AAIERETGFQcSAGISHNK(V)                     | 692.66  | +3 | 2,074.9 | 202-220 |
| (R)AAIERETGFQcSAGISHNK(V)                     | 736.67  | +3 | 2,207.0 | 202-220 |
| (R)AAIERETGFQcSAGISHNKVLAK(L)                 | 829.76  | +3 | 2,486.2 | 202-224 |
| (R)ETGFQcSAGISHNK(V)                          | 768.34  | +2 | 1,534.6 | 207-220 |
| (R)ETGFQcSAGISHNKVLAK(L)                      | 649.66  | +3 | 1,945.9 | 207-224 |
| (K)VLAKLAcGLNKPNR(Q)                          | 389.22  | +4 | 1,552.8 | 221-234 |
| (K)LAcGLNKPNR(Q)                              | 571.80  | +2 | 1,141.6 | 225-234 |
| (R)QTLVSHGSPQLFSQMPPIR(K)                     | 709.04  | +3 | 2,124.1 | 235-253 |
| (R)QTLVSHGSPQLFSQMPPIRK(I)                    | 597.06  | +4 | 2,384.2 | 235-254 |
| (R)KIRSLGGK(L)                                | 495.79  | +2 | 989.565 | 254-261 |
| (K)IrSLGGK(L)                                 | 431.74  | +2 | 861.471 | 255-261 |
| (R)SLGGKLGASVIEILGIEYMGELTQFTESQLQSHFGEK(N)   | 1,000.0 | +4 | 3,996.0 | 257-    |



|                                                           |         |    |              |             |
|-----------------------------------------------------------|---------|----|--------------|-------------|
|                                                           |         |    |              | 293         |
| (R)SLGGKLGASVIEILGIEYMGELTQFTESQLQSHFGEKNGSW<br>LYAMcR(G) | 1,309.6 | +4 | 5,234.5      | 257-<br>303 |
| (K)LGASVIEILGIEYMGELTQFTESQLQSHFGEK(N)                    | 1,185.6 | +3 | 3,553.7      | 262-<br>293 |
| (K)NGSWLYAMcR(G)                                          | 629.27  | +2 | 1,256.5      | 294-<br>303 |
| (R)GIEHDPVKPR(Q)                                          | 383.28  | +3 | 1,146.6      | 304-<br>313 |
| (R)GIEHDPVKPrQLPK(T)                                      | 873.46  | +2 | 1,744.9      | 304-<br>317 |
| (R)QLPKTIGcSK(N)                                          | 377.8   | +3 | 1,130.6<br>1 | 314-<br>323 |
| (K)TIGcSKNFPKG(T)                                         | 403.54  | +3 | 1,207.6<br>0 | 318-<br>328 |
| (K)NFPGKTALATR(E)                                         | 392.55  | +3 | 1,174.6      | 324-<br>344 |
| (K)NFPGKTALATREQVQWWLLQLAQELEER(L)                        | 839.44  | +4 | 3,353.7      | 324-<br>351 |
| (K)TALATREQVQWWLLQLAQELEER(L)                             | 981.83  | +3 | 2,942.4      | 329-<br>351 |
| (K)TALATREQVQWWLLQLAQELEER(L)                             | 937.83  | +3 | 2,810.4      | 329-<br>351 |
| (K)TALATREQVQWWLLQLAQELEERLTKDRNDNDRVATQL<br>VVSIR(V)     | 851.79  | +6 | 5,104.7      | 329-<br>371 |
| (R)EQVQWWLLQLAQELEER(L)                                   | 1,099.5 | +2 | 2,197.1      | 335-<br>351 |
| (R)EQVQWWLLQLAQELEERLTK(D)                                | 891.46  | +3 | 2,671.3<br>6 | 335-<br>354 |
| (R)EQVQWWLLQLAQELEERLTKDR(N)                              | 703.62  | +4 | 2,810.4      | 335-<br>356 |
| (R)LTKDRNDNDR(V)                                          | 416.20  | +3 | 1,245.6      | 352-<br>361 |

|                                          |         |    |         |         |
|------------------------------------------|---------|----|---------|---------|
| (K)DRNDNDR(V)                            | 452.69  | +2 | 903.378 | 355-361 |
| (K)DRNDNDRVATQLVVSIR(V)                  | 657.68  | +3 | 1,970.0 | 355-371 |
| (R)VATQLVVSIR(V)                         | 543.33  | +2 | 1,084.6 | 362-371 |
| (R)VQGDKRLSSLR(R)                        | 420.24  | +3 | 1,257.7 | 372-382 |
| (R)RccALTR(Y)                            | 468.72  | +2 | 935.442 | 383-389 |
| (R)RccALTR(Y)                            | 534.73  | +2 | 1,067.4 | 383-389 |
| (R)ccALTRYDAHK(M)                        | 763.83  | +2 | 1,525.6 | 384-394 |
| (R)ccALTRYDAHK(M)                        | 465.54  | +3 | 1,393.6 | 384-394 |
| (R)YDAHKMSHDAFTVIK(N)                    | 588.29  | +3 | 1,761.8 | 390-404 |
| (K)MSHDAFTVIK(N)                         | 574.79  | +2 | 1,147.5 | 395-404 |
| (K)MSHDAFTVIKNcNTSGIQTEWSPPLTMLFLcATK(F) | 975.47  | +4 | 3,897.8 | 395-428 |
| (K)NcNTSGIQTEWSPPLTMLFLcATK(F)           | 1,385.1 | +2 | 2,768.3 | 405-428 |

<sup>a</sup>lowercase 'm' indicates oxidation (+16) and lowercase 'c' indicates carbamidomethyl (+57) modification.

<sup>b</sup>Residues highlighted in red text were modified with HPG (+132).

## FIGURES

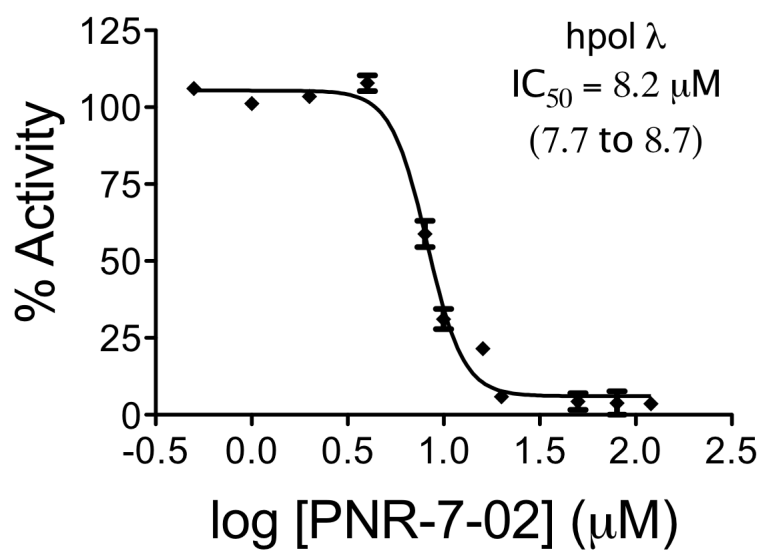

**FIGURE S1.** Determination of  $IC_{50}$  value for PNR-7-02 against hpol  $\lambda$ . The results shown represent the mean ( $\pm$  s.d.),  $n = 3$ . The  $IC_{50}$  value shown represents the best-fit value (95% confidence interval) derived from the fit of the data.

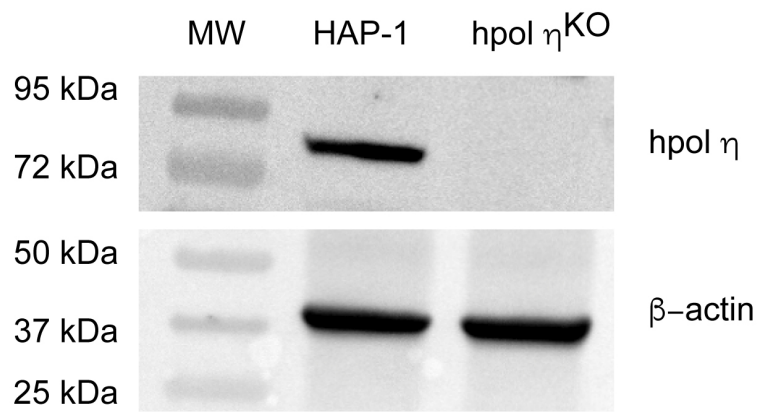

**FIGURE S2.** Validation of hpol  $\eta$  knock-out in HAP-1 cells. Immunoblotting was used to verify knock-out (KO) of hpol  $\eta$  in the HAP-1 cell line.

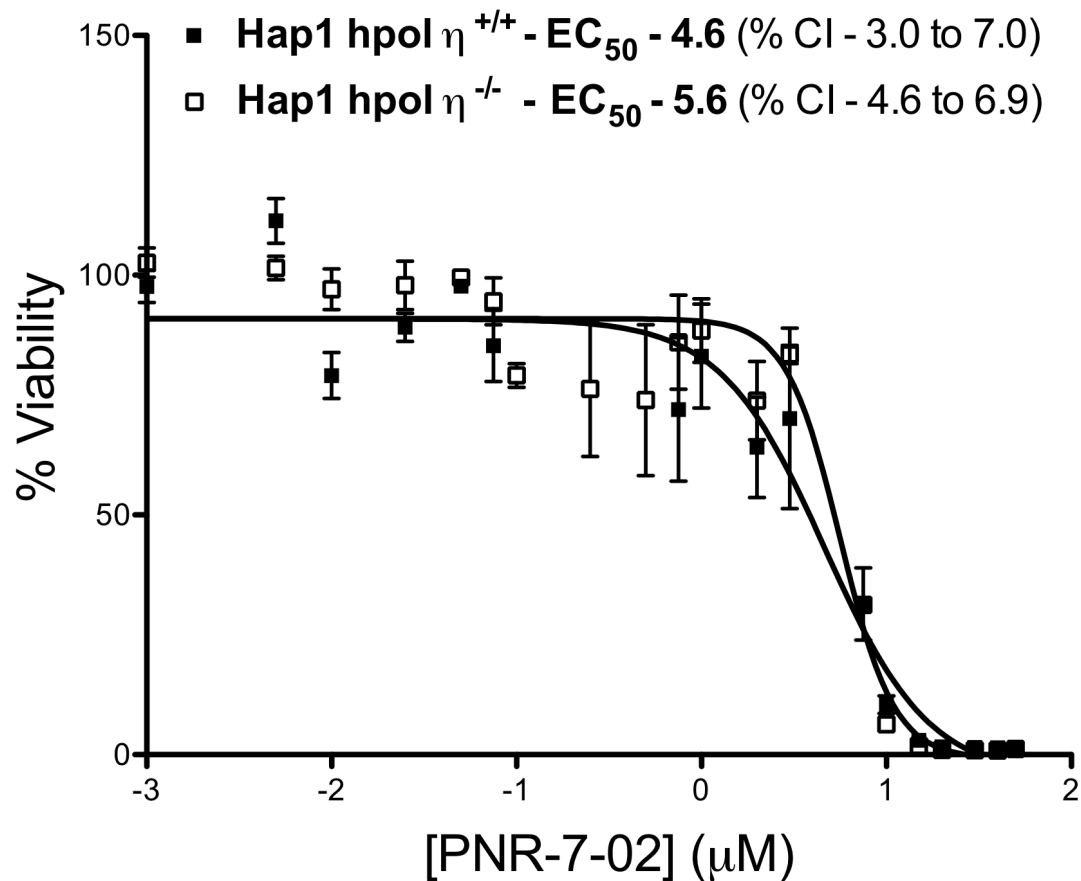

**FIGURE S3. Determination of  $EC_{50}$  values for PNR-7-02 in hpol  $\eta$ -proficient and hpol  $\eta$ -deficient HAP-1 cells.** The viability of hpol  $\eta$ -proficient and hpol  $\eta^{-/-}$  knock-out HAP-1 cells was measured as a function of PNR-7-02 concentration. Dose-response results were fit to a four-parameter logistic model using Prism software (GraphPad, San Diego, CA). The experiments were performed in triplicate and the mean ( $\pm$  s.e.m.) was plotted. The best-fit  $EC_{50}$  values (95% confidence interval) derived from the fit of the data for each cell line are reported above the plot.

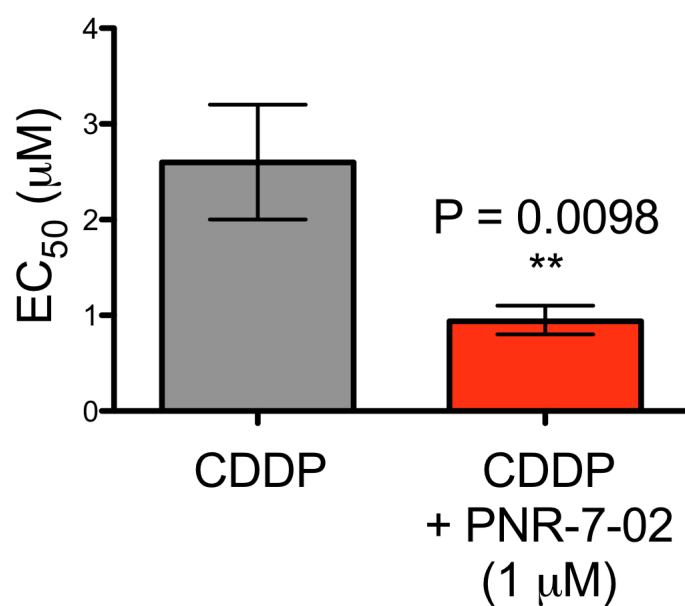

**FIGURE S4. PNR-7-02 sensitizes ovarian cancer-derived cells to CDDP.** OVCAR3 cells were exposed to varying concentrations of CDDP alone or in the presence of PNR-7-02 (1 μM). Cell viability was measured using the Calcein-AM assay. The EC<sub>50</sub> value for each treatment condition is shown (n=3, mean ± 95% confidence interval). An unpaired Student's t-test was used to compare treatment conditions. The Chou-Talalay method was used to calculate a combination index (CI) value of 0.40 using an EC<sub>50</sub> value of 24 μM for OVCAR3 cells treated with PNR-7-02 alone (data not shown).
